# Supplementary material for: Proton pump inhibitor ilaprazole suppresses cancer growth by targeting T-cell-originated protein kinase
Source: PubMed Central journal article supplement (PMC5503601; doi:10.18632/oncotarget.16609), 2017-03-27
Supplement: oncotarget-08-39143-s001.pdf [file oncotarget-08-39143-s001.pdf]

# Proton pump inhibitor ilaprazole suppresses cancer growth by targeting T-cell-originated protein kinase

## SUPPLEMENTARY FIGURES

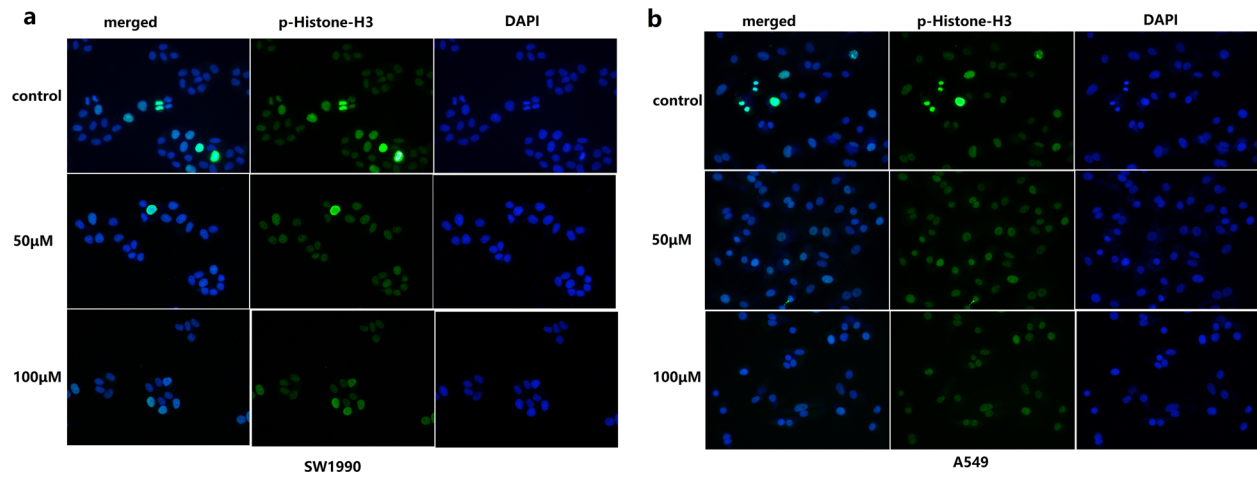

Supplementary Figure 1: Immunocytochemical staining analysis of p-Histone H3 in SW1990 and A549 cells.

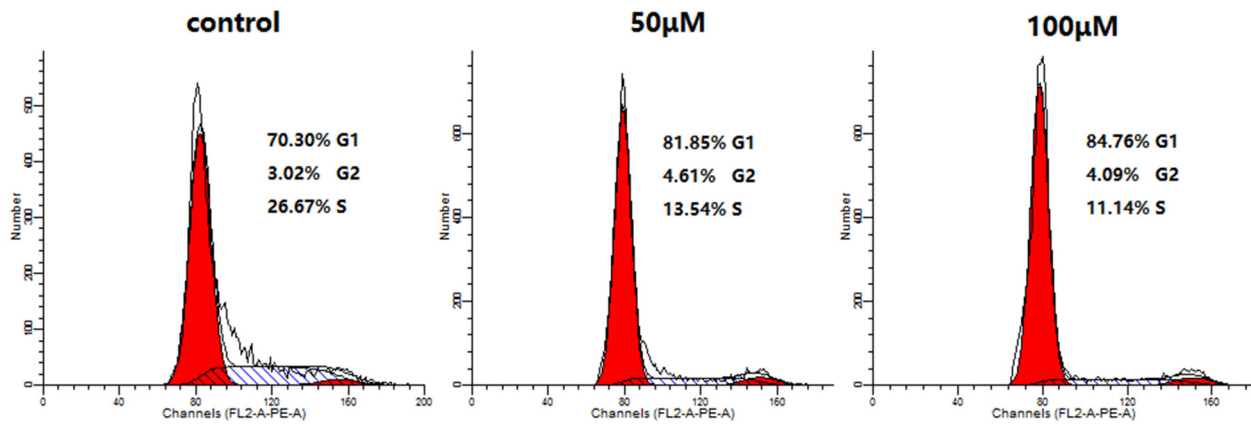

Supplementary Figure 2: Ilaprazole induced cell cycle arrested at the G1 phase in HCT116 cells.

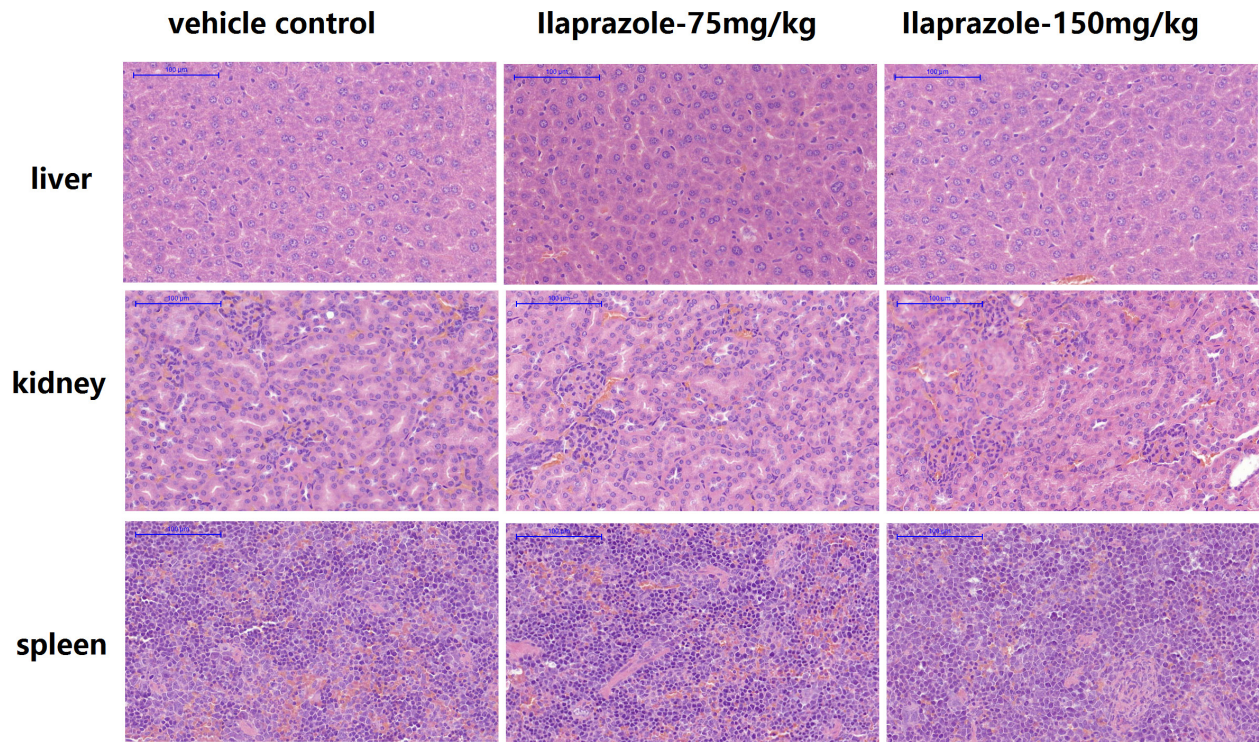

**Supplementary Figure 3: Microstructures of sections of the liver, kidney and spleen in control mice and mice treated with doses of ilaprazole daily for 15 days.** No significant damage was observed in all treatment groups. Magnification 400×(DXIT 1200, Nikon, Japan).
